# Supplementary material for: Differentiating Aβ40 and Aβ42 in amyloid plaques with a small molecule fluorescence probe
Source: Royal Society of Chemistry journal article supplement (doi:10.1039/d0sc02060e), 2020-01-01
Supplement: d0sc02060e1.pdf [file d0sc02060e1.pdf]

## Supporting Information

### **Differentiating A $\beta$ 40 and A $\beta$ 42 in amyloid plaques with a small molecule fluorescence probe**

Jing Yang, Biyue Zhu, Wei Yin, Zhihao Han, Chao Zheng, Peng Wang\*, and Chongzhao Ran\*

#### **Table of Contents**

|                                 |     |
|---------------------------------|-----|
| Materials and instruments ..... | S3  |
| Experimental procedures .....   | S3  |
| Synthesis of probes .....       | S5  |
| Table S1 .....                  | S8  |
| Figure S1 .....                 | S8  |
| Figure S2 .....                 | S9  |
| Figure S3 .....                 | S9  |
| Figure S4 .....                 | S10 |
| Figure S5 .....                 | S10 |
| Figure S6 .....                 | S11 |
| Figure S7 .....                 | S11 |
| Figure S8 .....                 | S12 |
| Figure S9 .....                 | S12 |
| Figure S10 .....                | S13 |
| Figure S11 .....                | S13 |
| Figure S12 .....                | S14 |
| Figure S13 .....                | S14 |
| Figure S14 .....                | S15 |
| Figure S15 .....                | S15 |
| Figure S16 .....                | S16 |
| Figure S17 .....                | S16 |
| Figure S18 .....                | S17 |
| Figure S19 .....                | S17 |
| Figure S20 .....                | S18 |

---

|                 |     |
|-----------------|-----|
| Figure S21..... | S18 |
| Figure S22..... | S19 |
| Figure S23..... | S19 |

---

## Materials and instruments

All chemicals were purchased through commercial vendors and used without further purification. Absorption spectra were recorded on SpectraMax (Molecular Device, San Jose, CA). A fluorescence spectrophotometer F-7100 (Hitachi High-Tech Corporation, Japan) was employed for fluorescent spectra recording.  $^{13}\text{C}$  NMR and  $^1\text{H}$  NMR spectra were collected on a JOEL 500-MHz Spectrometer (JEOL USA, Inc.), and the values of  $\delta$  are in ppm respect to TMS. LC-MS was carried out on an Agilent 1200 Series apparatus with an LC/MSD trap (Agilent Technologies) and Daly conversion dynode detector with UV detection at 254 nm. Tissue imaging was performed on Nikon Eclipse 50i (Nikon Corporation). Two-photon imaging in vivo was conducted on an Olympus BX-51 microscope (Olympus Life Science). Transgenic female 5xFAD mice and age-matched wild-type female mice were purchased from Jackson Laboratory. All animal experiments were performed in strict accordance with the NIH guidelines for the care and use of laboratory animals (NIH Publication No. 85-23 Rev. 1985) and was approved by the Institutional Animal Care and Use Committee at Massachusetts General Hospital. An IVIS Spectrum animal imaging system (Perkin Elmer) was used for in vitro plate imaging.

## Experimental Procedures

**Spectra and quantum yield of ICTAD-1 in different organic solvents.** The absorption spectrum of ICTAD-1 (10  $\mu\text{M}$ ) in the solution of PBS (10 mM, pH 7.4, 1% DMF) was recorded on SpectraMax Microplate Reader (Molecular Device, San Jose, CA). The ICTAD-1 stock solution was prepared in DMF and all testing solutions contained a final concentration of 1% DMF. The fluorescent spectra of ICTAD-1 (10  $\mu\text{M}$ ) in a solution of different organic solvents were performed on the F-7100 fluorescence spectrophotometer with Ex = 430 nm, slit 2.5/2.5, and 400 V for PMT. The quantum yields of ICTAD-1 were calculated based on Rhodamine B in ethanol ( $\Phi_F = 0.64$ ).

**Spectroscopy of ICTAD-1 in solvents with increasing viscosity.** Emission spectra of ICTAD-1 (10  $\mu\text{M}$ ) in solutions of methanol, methanol & ethylene glycol (1:1, v/v), ethylene glycol (EG), ethylene glycol & glycerol (1:1 v/v) and glycerol (Gly) at room temperature were performed on the F-7100 fluorescence spectrofluorometer.

**The light stability of ICTAD-1.** Light stability of ICTAD-1 (10  $\mu\text{M}$ ) in DMF was investigated under the irradiation of an incandescent lamp (25 W, 120 V, GE Lighting). The absorption and fluorescent spectra at different time points were recorded and the duration was 120 minutes.

**pH effects on the spectroscopy of ICTAD-1.** Absorption spectra of ICTAD-1 (10  $\mu\text{M}$ ) in different pH aqueous solutions (1% DMF) was recorded on SpectraMax Microplate Reader. The fluorescent spectra of ICTAD-1 (10  $\mu\text{M}$ ) in different pH aqueous solutions (1% DMF) were recorded on the F-7100 fluorescence spectrophotometer with Ex = 430 nm, slit 2.5/2.5, and 400 V for PMT.

**Molecule docking studies.** Molecular docking simulations were conducted with the Molecular Operating Environment (MOE) software version 2014.0901 (Chemical Computing Group, Montreal, Canada). The crystal structures of A $\beta$  (PDB ID: 5OQV, 2MVX, 6SHS, and 2NAO) were obtained from the Protein Database (www.rcsb.org). Hydrogen atoms were added to the protein and energy minimization was performed using the MMFF94 force field. Docking of the ligands into the active site of the A $\beta$  was performed by the triangle matcher docking protocol of the MOE program. As the refinement method, the force field was chosen. The resulting poses are then scored using the GBVI/WSA dG docking scoring function. The figures were generated using Discovery Studio 2019 Client.

**Preparation of A $\beta$ 40 and A $\beta$ 42 aggregates/fibrils.** A $\beta$ 40 (trifluoroacetic acid) peptide powder was dissolved in PBS (10 mM, pH 7.4, 25  $\mu$ M). The solution was stirred at 37 °C for 3 days to give A $\beta$ 40 aggregates/fibrils. This stock solution was stored at 4 °C. A $\beta$ 42 aggregates/fibrils were prepared following the same procedure as A $\beta$ 40 fibrils.

**Fluorescence responses of ICTAD-1 in the presence of A $\beta$  species.** Fluorescence spectra of ICTAD-1 (250 nM) in PBS (10 mM, pH 7.4, 1% DMF) were recorded before and after the addition of different concentrations of A $\beta$ s (0-12.5  $\mu$ M) with Ex = 430 nm, slit 5/5, and 700 V for PMT. Binding constant values (K<sub>d</sub>) were calculated with Prism.

**Kinetic study of ICTAD-1 in the presence of A $\beta$  species.** ICTAD-1 (250 nM) was incubated with A $\beta$  (2.5  $\mu$ M, 10 eq) in PBS (10 mM, pH 7.4, 1% DMF), and fluorescent spectra were recorded at different time points within 20 min (Ex = 430 nm, slit 5/5, 700 V for PMT).

**Selectivity of ICTAD-1 towards A $\beta$  fibrils over metal ions, BSA and HSA.** Fluorescent spectra of ICTAD-1 (10  $\mu$ M) with different analytes in PBS (10 mM, pH 7.4, 1% DMF) were recorded, and concentrations of metal ions, amino acids, and thiols were 1 mM. PBS solutions of BSA and HSA were also tested with ICTAD-1 (10  $\mu$ M) (Ex = 430 nm, slit 5/5, 400 V for PMT).

**Plate imaging of ICTAD-1.** ICTAD-1 (250 nM) was incubated with different concentrations of A $\beta$ 40 or A $\beta$ 42 (2.5  $\mu$ M, 10 eq) in PBS (10 mM, pH 7.4, 1% DMF). The resulting solution was added to wells on a 96-well plate, and the final volume of each well was 200  $\mu$ L. Triplicate samples were used for each condition. Plate images were recorded on the IVIS System. Moreover, the plate imaging of ICTAD-1 with A $\beta$ 40 fibrils and A $\beta$ 42 fibrils (2.5  $\mu$ M, 10 eq) in the presence of BSA (2.5  $\mu$ M, 10 eq) or mouse brain homogenate (BH, 0.1 mg/mL) was also performed similarly to the above procedure.

**In vitro histological staining.** A fresh brain tissue from a 24-month old APP/PS1 mouse was fixed in 4% formaldehyde for 24 hours and transferred into 30% sucrose at 4 °C until the tissue sunk. Then the tissue was embedded in OCT with gradual cooling over dry ice. The OCT embedded tissue block was sectioned into 25- $\mu$ m slice with a cryostat. The tissue was washed in diluting buffer (0.4% Triton X-100, 1% goat serum,

2% BSA in TBS) for 3x10min, then blocked in 20% goat serum for 30min at room temperature. Then the slice was incubated with primary antibody 6E10 overnight at 4°C. After washed with diluting buffer for 3x10min, the slice was incubated with secondary antibody for 2 hours at room temperature. Then the slice was washed with TBS for 3x10min. 25 uM of ICTAD-1 in 20% ethanol/PBS was prepared as the staining solution. The brain slice was incubated with freshly prepared staining solution for 15 min at room temperature and then washed with 50% ethanol for 2x1min, followed by washing with double distilled water twice. Then the slice was covered with FluoroShield mounting medium (Abcam) and sealed with nail polish. Florescence images were obtained using the Nikon Eclipse 50i microscope with blue and red-light excitation channel.

**Confocal spectral unmixing imaging.** The above brain slice was placed under a Nikon confocal microscope (A1R HD25). Excitation laser of 468 nm was used, and emission was collected from 505 nm to 690 nm with 2.5 nm steps. A region of interest (ROI) was selected from the core and peripheral area of a plaque respectively, and a spectrum from each ROI was extracted and stored into the system as the spectral library. Spectral unmixing was performed with the spectra stored in the library. The unmixing spectra was achieved by averaging the data collected from three individual plaques (core and periphery respectively).

**In vivo two-photon imaging.** These animal experiments were performed in strict accordance with the NIH guidelines for the care and use of laboratory animals (NIH Publication No. 85-23 Rev. 1985) and was approved by the Institutional Animal Care and Use Committee at Massachusetts General Hospital. A 15-month-old 5xFAD female mouse was anesthetized with 2% isoflurane, and a cranial imaging window was surgically prepared as described [2]. Before ICTAD-1 injection, two-photon images of capillary were acquired using the 800-nm laser (Prairie Ultima) with 500 to 550 nm emission by injection of FITC-Dextran. A bolus i.v. injection of ICTAD-1 (1.0 mg/kg in a fresh solution of 15% cremophor, 15% DMSO, and 70% PBS) was administered. The images were acquired at 5 minutes after the ICTAD-1 injection and with emission channels of 500-550 nm and 570-620 nm. For imaging, we used a two-photon microscope (Olympus BX-51) equipped with a 20× water-immersion objective (0.45 numerical aperture; Olympus) [3]. Single Images and Z-series images were collected with a 512 × 512-pixel resolution. Image analysis was performed with ImageJ software.

## Synthesis of probes

### Synthesis of ICTAD-1

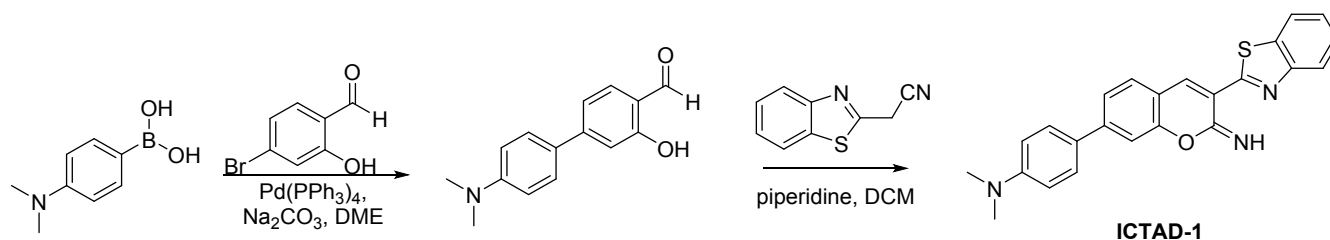

4-(Dimethylamino)phenylboronic acid (534 mg, 3.2 mmol) and 4-bromo-2-hydroxybenzaldehyde (500 mg, 2.5 mmol) were dissolved in 1,2-dimethoxyethane (35 mL). To the resulting solution,  $\text{Pd}(\text{PPh}_3)_4$  (287 mg, 0.25 mmol) and a aqueous solution of sodium carbonate (2 M, 25 mL) were added under  $\text{Ar}_2$ . The mixture was heated and stirred for 5 h under 90 °C. After the reaction completed, the solution was extracted with ethyl

acetate for three times. The combined organic layers were dried by anhydrous sodium sulfate. After filtration, the solvent was removed by rotary evaporator. The residue was purified by silica gel column to give the compound 4'-(dimethylamino)-3-hydroxy-[1,1'-biphenyl]-4-carbaldehyde (422 mg, yield 70%). <sup>1</sup>H-NMR (500 MHz, CDCl<sub>3</sub>) δ 11.14 (s, 1H), 9.83 (s, 1H), 7.56 (d, 2H), 7.52 (d, 1H), 7.21 (d, 1H), 7.16 (s, 1H), 6.76 (d, 2H), 3.01 (s, 6H). <sup>13</sup>C-NMR (125 MHz, CDCl<sub>3</sub>) δ 195.6, 162.2, 151.1, 149.9, 134.1, 128.2, 126.4, 118.7, 117.7, 113.9, 112.4, 40.4. MS: 242.1 [M+H]<sup>+</sup>.

4'-(Dimethylamino)-3-hydroxy-[1,1'-biphenyl]-4-carbaldehyde (72 mg, 0.3 mmol) and 2-benzothiazoleacetonitrile (68 mg, 0.39 mmol) were dissolved in ethanol (3 mL) and dichloromethane (3 mL), followed by the addition of piperidine (1 drop). The resulting mixture was stirred for 3 h at room temperature. The formed solid was filtered and washed with ethanol to give the probe **ICTAD-1** (100 mg, Yield 84%). <sup>1</sup>H-NMR (500 MHz, CDCl<sub>3</sub>) δ 8.06 (d, 1H), 7.92 (d, 1H), 7.55 (d, 2H), 7.49 (d, 2H), 7.39-7.42 (m, 3H), 7.38 (s, 2H), 6.78 (d, 2H), 3.02 (s, 6H). <sup>13</sup>C-NMR (125 MHz, CDCl<sub>3</sub>) δ 207.1, 154.1, 150.8, 136.1, 129.2, 127.9, 126.6, 126.4, 125.3, 122.9, 121.7, 121.5, 112.6, 112.3, 40.4. MS: 398.1 [M+H]<sup>+</sup>.

## Synthesis of ICTAD-2

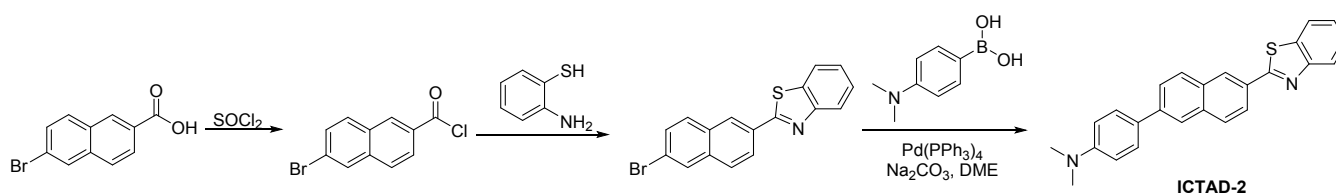

**Step 1 and 2.** 6-Bromo-2-naphthoic acid (1.0 g, 4.0 mmol) was added to SOCl<sub>2</sub> (10 mL), and the resulting mixture was stirred for 4 h at 80 °C. After the solvent was removed under reduced pressure, 2-aminobenzenethiol (0.6 g, 4.8 mmol) and pyridine (30 mL) were added to the residue, and the solution was stirred for 12 h at 115 °C. After the solvent was removed under reduced pressure, the resulting residue was purified by the silica gel chromatography using *n*-hexane/CH<sub>2</sub>Cl<sub>2</sub> (1:1, v/v) as eluent to afford compound 2-(6-bromonaphthalen-2-yl)benzo[d]thiazole as a gray solid (0.98 g, 72%). <sup>1</sup>H-NMR (500 MHz, CDCl<sub>3</sub>) δ 8.50 (s, 1H), 8.21 (dd, 1H), 8.10 (d, 1H), 8.02 (s, 1H), 7.91 (d, 1H), 7.82 (dd, 2H), 7.60 (dd, 1H), 7.51 (t, 1H), 7.40 (t, 1H). <sup>13</sup>C-NMR (125 MHz, CDCl<sub>3</sub>) δ 167.6, 154.3, 135.6, 135.2, 131.7, 131.5, 130.4, 130.1, 127.9, 127.4, 126.6, 125.6, 125.5, 123.4, 121.8, 121.7, 31.0. MS: 340.0, 342.0 [M+H]<sup>+</sup>.

**Step 3.** 2-(6-Bromonaphthalen-2-yl)benzo[d]thiazole (160 mg, 0.47 mmol) and 4-(dimethylamino)phenylboronic acid (93 mg, 0.56 mmol) were dissolved in 1,2-dimethoxyethane (10 mL). To the resulting mixture, Pd(PPh<sub>3</sub>)<sub>4</sub> (54 mg, 0.047 mmol) and a solution of sodium carbonate (2 M, 8 mL) were added under Ar<sub>2</sub>. The mixture was heated and stirred for 5 h under 90 °C. After the reaction completed, the solution was extracted with ethyl acetate for three times. The combined organic layers were dried by anhydrous sodium sulfate. After filtration, the solvent was removed by rotary evaporator, and the resulting residue was purified by silica gel column to give **ICTAD-2** (139 mg, yield 78%). <sup>1</sup>H-NMR (500 MHz, CDCl<sub>3</sub>) δ 8.54 (s, 1H), 8.18 (d, 1H), 8.10 (d, 1H), 8.00 (s, 1H), 7.96-7.99 (m, 3H), 7.93 (d, 1H), 7.65 (d, 2H), 7.50 (t, 1H), 7.39 (t, 1H), 6.84 (d, 2H), 3.02 (s, 6H). <sup>13</sup>C-NMR (125 MHz, CDCl<sub>3</sub>) δ 207.1, 168.4, 154.4, 150.3, 140.3, 135.3, 135.2, 131.8, 130.4, 129.2, 128.9, 128.3, 128.1, 127.4, 126.4, 126.3, 125.2, 124.8, 124.0, 123.2, 121.7,

**Synthesis of ICTAD-3**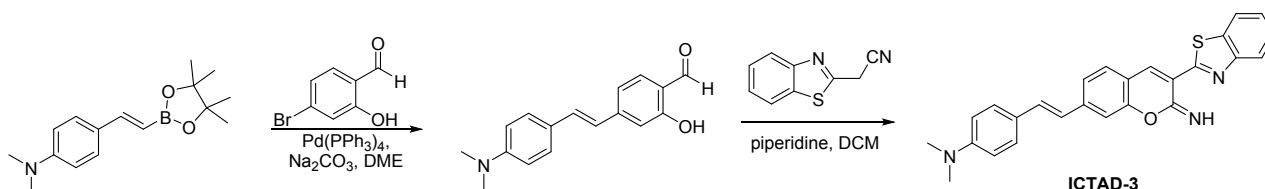

**Step 1.** 2-(4-*N,N*-dimethylphenyl)vinylboronic acid pinacol ester (328 mg, 1.2 mmol) and 4-bromo-2-hydroxybenzaldehyde (201 mg, 1.0 mmol) were dissolved in 1,2-dimethoxyethane (20 mL). To the resulting mixture, Pd(PPh<sub>3</sub>)<sub>4</sub> (115 mg, 0.1 mmol) and a solution of sodium carbonate (2 M, 10 mL) were added under Ar<sub>2</sub>. The mixture was heated and stirred for 7 h under 90 °C. After the reaction completed, the solution was extracted with ethyl acetate for three times. The combined organic layers were dried by anhydrous sodium sulfate. After filtration, the solvent was removed by rotary evaporator to provide a semi-solid residue. To the resulting residue, a mixture of ethyl acetate and *n*-hexane (1:1, v/v, 10 mL) was added and white precipitate was formed. The precipitate was filtered to afford (*E*)-4-(4-(dimethylamino)styryl)-2-hydroxybenzaldehyde, which was used for next step without further purification.

**Step 2.** (*E*)-4-(4-(dimethylamino)styryl)-2-hydroxybenzaldehyde (75 mg, 0.27 mmol) and 2-benzothiazoleacetonitrile (49 mg, 0.28 mmol) were dissolved in ethanol (10 mL) and dichloromethane (2 mL), followed by the addition of piperidine (1 drop). The resulting solution was stirred for 3 h at room temperature. The formed solid was filtered and washed with ethanol to give the compound **ICTAD-3** (60 mg, Yield 52%). <sup>1</sup>H-NMR (500 MHz, CDCl<sub>3</sub>) δ 8.05 (d, 1H), 7.92 (d, 1H), 7.49-7.41 (m, 6H), 7.28-7.38 (m, 1H), 7.27 (s, 1H), 7.22 (d, 1H), 6.86 (d, 1H), 6.69 (d, 2H), 2.99 (s, 6H). <sup>13</sup>C-NMR (125 MHz, CDCl<sub>3</sub>) δ 207.1, 154.0, 152.7, 150.7, 143.1, 135.9, 132.3, 129.0, 128.3, 126.3, 125.3, 124.7, 122.9, 121.9, 121.5, 117.6, 112.3, 112.2, 40.4 MS: 424.2 [M+H]<sup>+</sup>.

**Synthesis of ICTAD-4**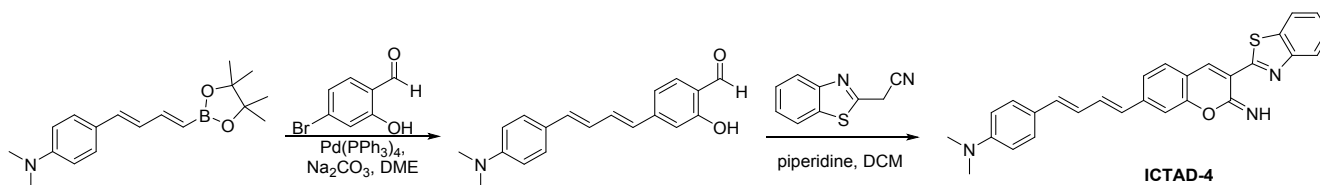

**ICTAD-4** was obtained by following the similar procedure as ICTAD-3. <sup>1</sup>H-NMR (500 MHz, CDCl<sub>3</sub>) δ 8.05 (d, 1H), 7.91 (d, 1H), 7.48-7.50 (m, 1H), 7.33-7.39 (m, 5H), 7.21 (d, 1H), 7.16 (s, 1H), 7.03-7.05 (m, 1H), 6.76-6.79 (m, 1H), 6.66-6.74 (m, 3H), 6.52 (d, 1H), 2.98 (s, 6H). <sup>13</sup>C-NMR (125 MHz, CDCl<sub>3</sub>) δ 207.1, 153.9, 150.5, 135.9, 133.5, 129.0, 128.5, 128.0, 126.4, 125.3, 124.4, 123.0, 122.0, 121.5, 112.3, 40.4. MS: 450.1 [M+H]<sup>+</sup>.

**Table S1.** The summary of properties of ICTAD-1 in different organic solvents.

| solvent         | polarity | QY   | Max emission wavelength (nm) |
|-----------------|----------|------|------------------------------|
| Hexane          | 0.06     | 1.26 | 514                          |
| Toluene         | 2.4      | 0.84 | 537                          |
| Ethyl ether     | 2.9      | 0.75 | 550                          |
| Chloroform      | 4.4      | 0.58 | 570                          |
| EA              | 4.3      | 0.57 | 581                          |
| THF             | 4.2      | 0.56 | 588                          |
| Isopropanol     | 4.3      | 0.16 | 625                          |
| Acetone         | 5.4      | 0.21 | 630                          |
| DMF             | 6.4      | 0.11 | 644                          |
| Acetonitrile    | 6.2      | 0.08 | 646                          |
| Methanol        | 6.6      | 0.01 | 650                          |
| DMSO            | 7.2      | 0.06 | 658                          |
| Ethylene glycol | 6.9      | 0.02 | 660                          |

QY: quantum yield, determined versus Rhodamine B in ethanol (0.65)

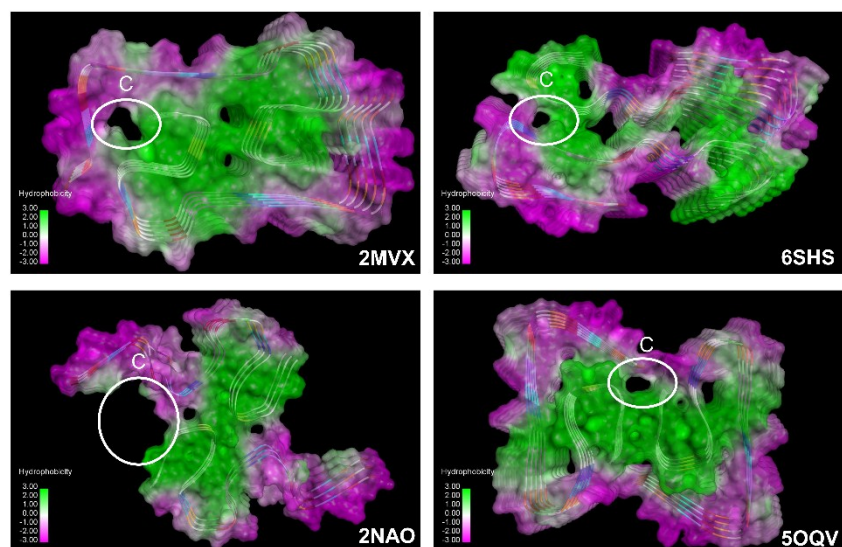

**Figure S1.** Binding sites C of Aβ proteins. (Aβ 40: 2MVX and 6SHS; Aβ 42: 2NAO and 5OQV).



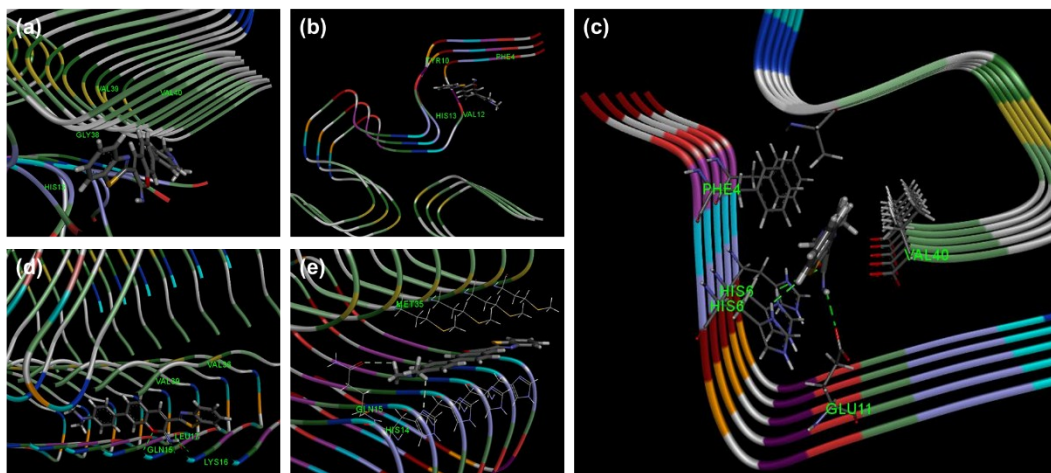

**Figure S2.** The binding models of probe ICTAD-1 with A $\beta$  fibrils (a) PDB: 5KK3; (b) PDB: 2NAO; (c) PDB: 2MVX; (d) PDB: 2MMPZ; (e) PDB: 6SHS.

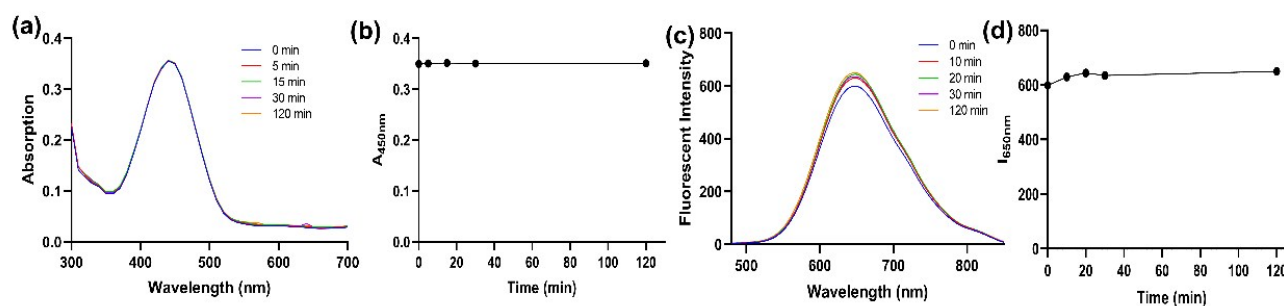

**Figure S3.** Light stability of ICTAD-1. The absorption (a) and fluorescent spectra (b) changes of ICTAD-1 (10  $\mu$ M) in DMF under the irradiation of daylight lamp for 120 min; the quantification of absorbance at 450 nm (a) or fluorescent intensity at 650 nm (b) of ICTAD-1 (10  $\mu$ M) in DMF under the irradiation of daylight lamp within 120 min.

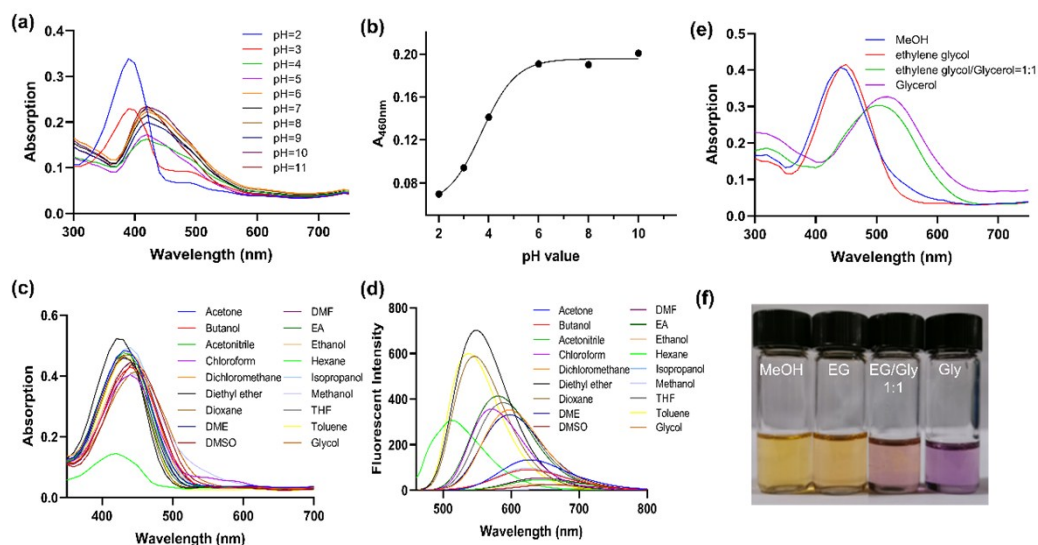

**Figure S4.** (a) The absorption spectra of ICTAD-1 (10  $\mu\text{M}$ ) in different pH aqueous solutions; (b) the fitted curve between pH values and absorbance at 460 nm; (c) the absorption spectra of ICTAD-1 (10  $\mu\text{M}$ ) in different solvents; (d) the fluorescent spectra of ICTAD-1 (10  $\mu\text{M}$ ) in different solvents; (e) the absorption spectra of ICTAD-1 (10  $\mu\text{M}$ ) in solvent with different viscosity; (f) the picture of ICTAD-1 (10  $\mu\text{M}$ ) in solvent with different viscosity.

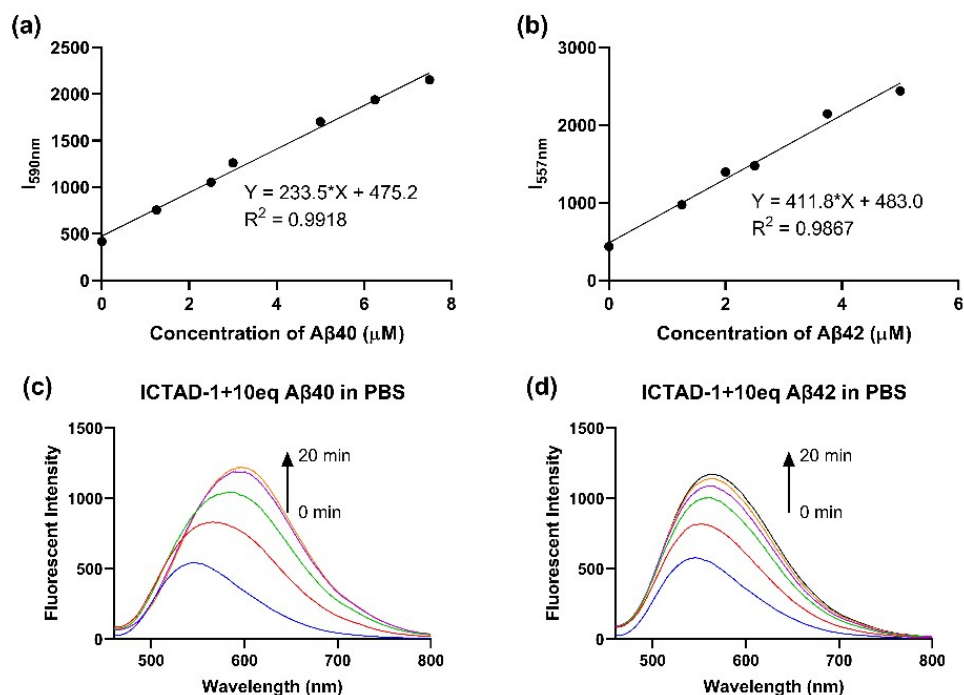

**Figure S5.** (a) the linear relationship between the concentration of A $\beta$ 40 (0-7.5  $\mu\text{M}$ ) and the fluorescent intensities at 590 nm; (b) the linear relationship between the concentration of A $\beta$ 42 (0-5  $\mu\text{M}$ ) and the fluorescent intensities at 557 nm; (c-d) Time dependence of ICTAD-1 (250 nM) toward A $\beta$  (10 eq, 2.5  $\mu\text{M}$ ) in PBS (10 mM, pH7.4, 1% DMF).

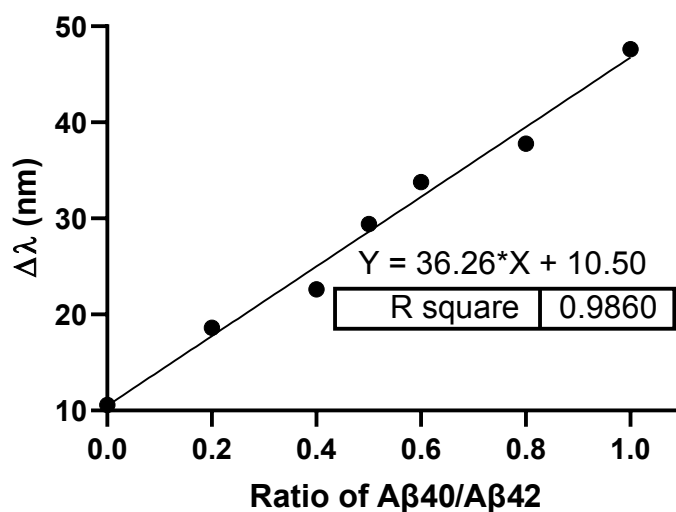

**Figure S6.** The linear relationship between the ratio of Aβ40/Aβ42 and the redshifted wavelength.

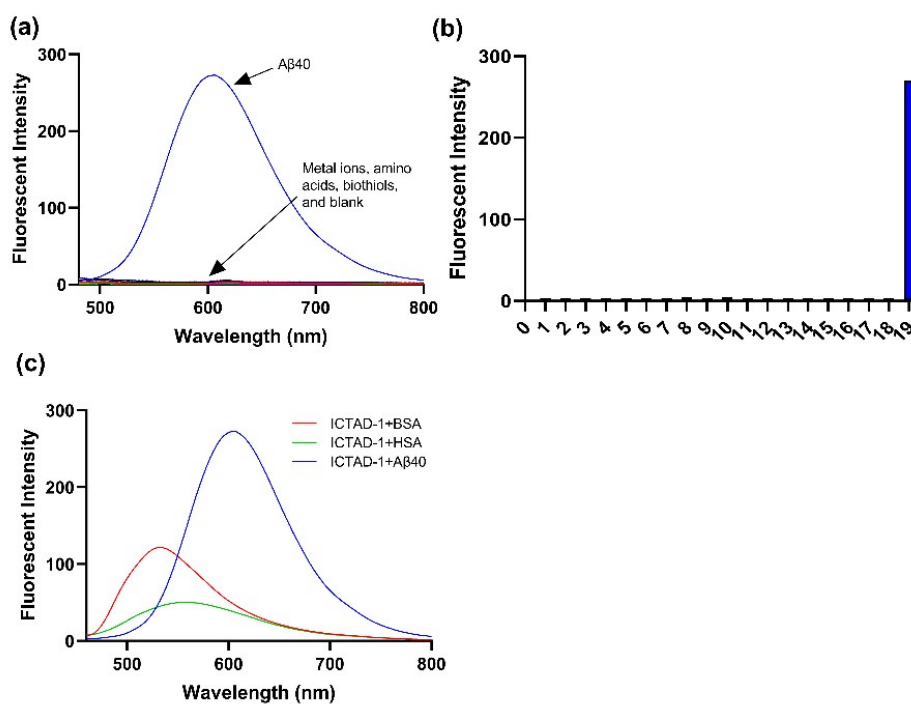

**Figure S7.** (a) Selectivity of ICTAD-1 (10 μM) toward Aβ. (1. Blank; 2. Na<sup>+</sup>; 3. K<sup>+</sup>; 4. Ca<sup>2+</sup>; 5. Mg<sup>2+</sup>; 6. Zn<sup>2+</sup>; 7. Cu<sup>2+</sup>; 8. Mn<sup>2+</sup>; 9. Al<sup>3+</sup>; 10. Fe<sup>3+</sup>; 11. Arg; 12. Asp; 13. Glu; 14. His; 15. Leu; 16. Lys; 17. Cys; 18. GSH; 19. Aβ); (b) The qualification of fluorescent intensities; (c) The fluorescence spectra of ICTAD-1 (10 μM) in the presence of HSA (10 μM) or BSA(10 μM).

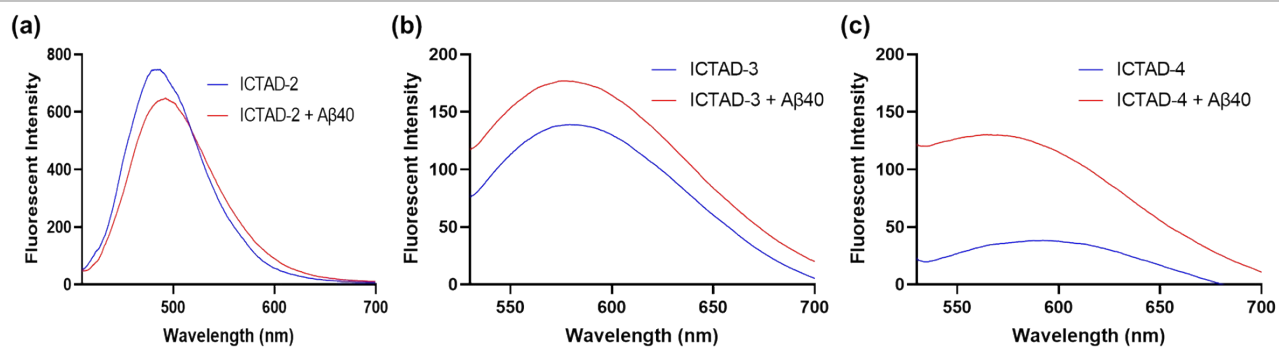

**Figure S8.** Fluorescent spectra of ICTAD-2, ICTAD-3, and ICTAD-4 (250nM) in the absence or presence of Aβ40 (250 nM) in PBS (10 mM, pH 7.4, 1% DMF)

|          |   |     |    |    |    |    |    |     |
|----------|---|-----|----|----|----|----|----|-----|
| ICTAD-1  | + | +   | +  | +  | +  | +  | +  | +   |
| Aβ40 (%) | - | 0   | 20 | 40 | 50 | 60 | 80 | 100 |
| Aβ42 (%) | - | 100 | 80 | 60 | 50 | 40 | 20 | 0   |

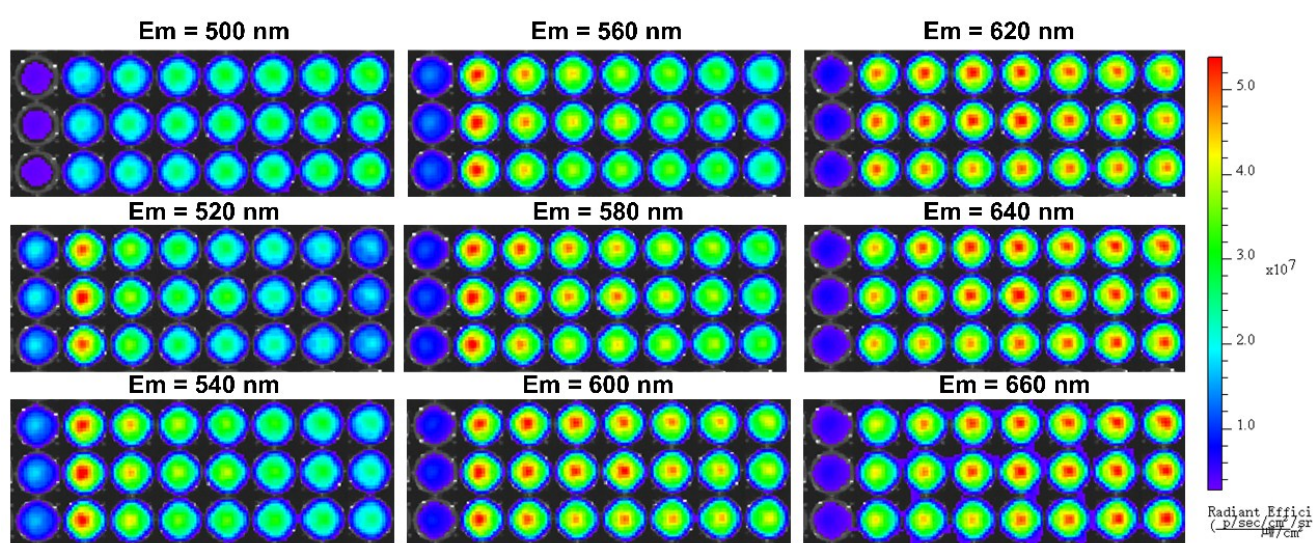

**Figure S9.** Raw images of plate imaging with ICTAD-1 (250 nM) in the presence of different ratios of Aβ40/Aβ42 (2.5 μM, 10 eq) in 96-wells plate before unmixing.

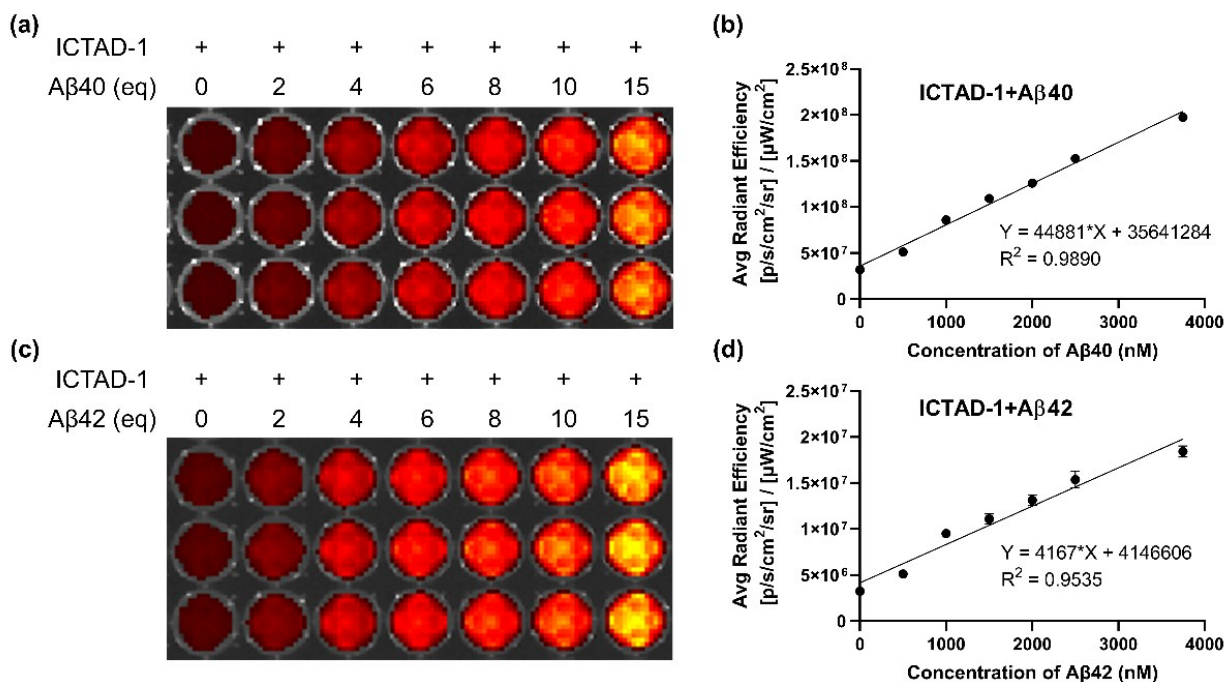

**Figure S10.** (a) Plate imaging of ICTAD-1 (250 nM) in the presence of different concentrations of A $\beta$ 40 (0- 4  $\mu$ M) in 96-wells plate.  $E_x = 430$  nm,  $E_m = 620$  nm. (b) the linear relationship between the concentration of A $\beta$ 40 and the average radiant efficiency. (c) Plate imaging of ICTAD-1 (250 nM) in the presence of different concentrations of A $\beta$ 42 (0- 4  $\mu$ M) in 96-wells plate.  $E_x = 430$  nm,  $E_m = 580$  nm. (d) the linear relationship between the concentration of A $\beta$ 42 and the average radiant efficiency.

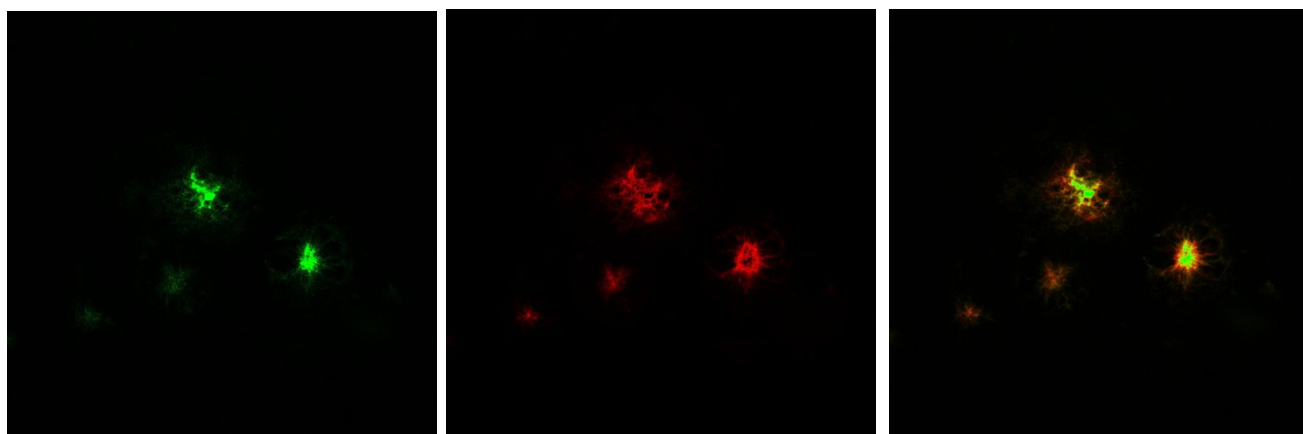

**Figure S11.** Confocal spectral unmixing for multiple plaques to dissect the signals from A $\beta$ 42 (green) and A $\beta$ 40 (red).

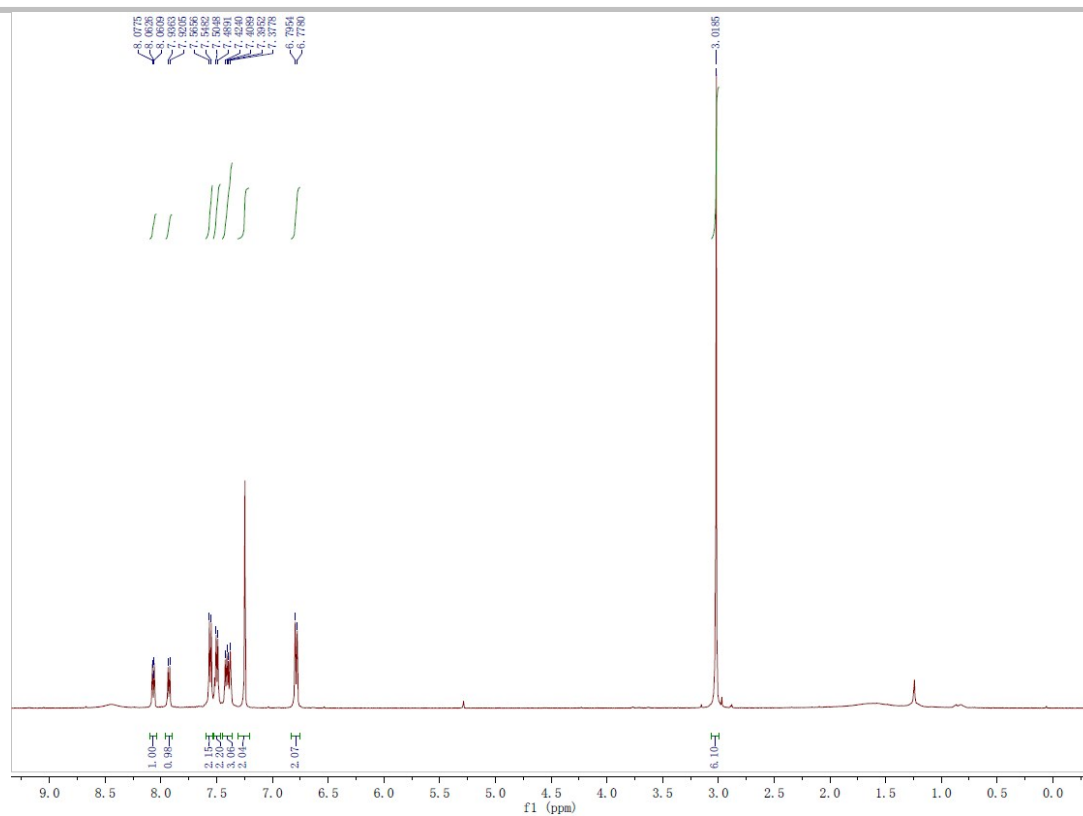

Figure S12. <sup>1</sup>H-NMR spectrum of ICTAD-1

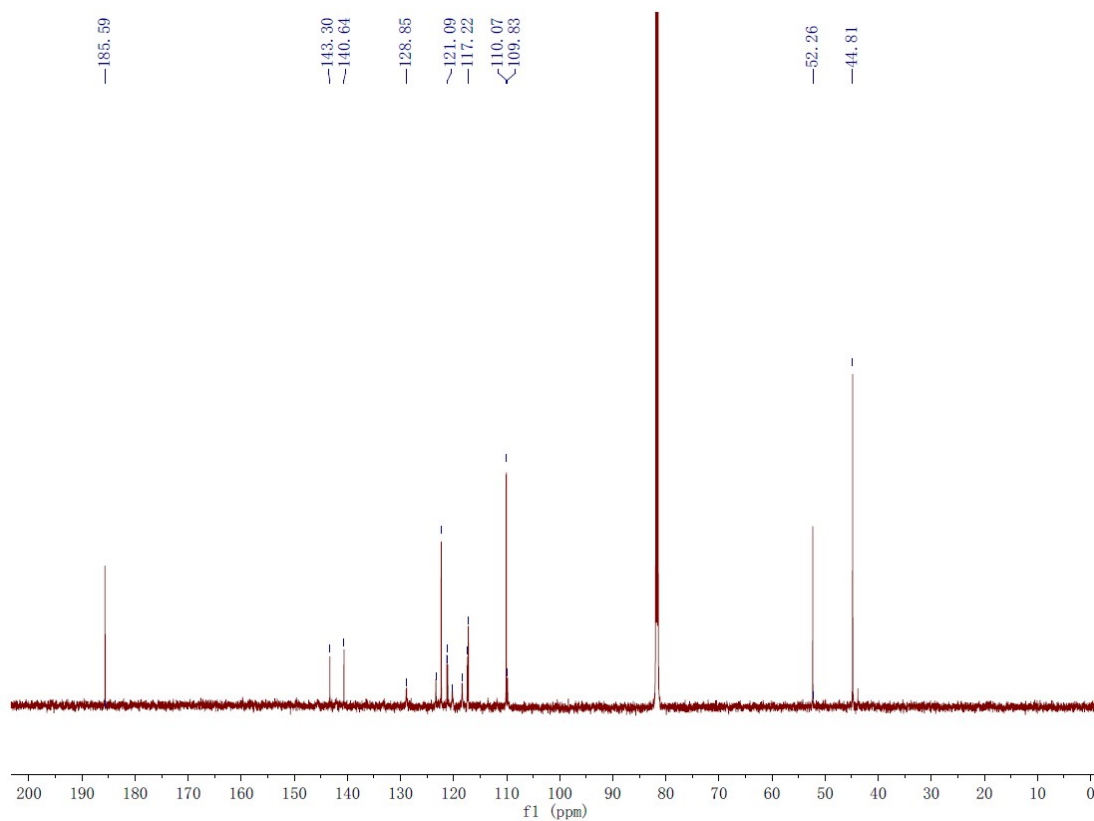

Figure S13. <sup>13</sup>C-NMR spectrum of ICTAD-1

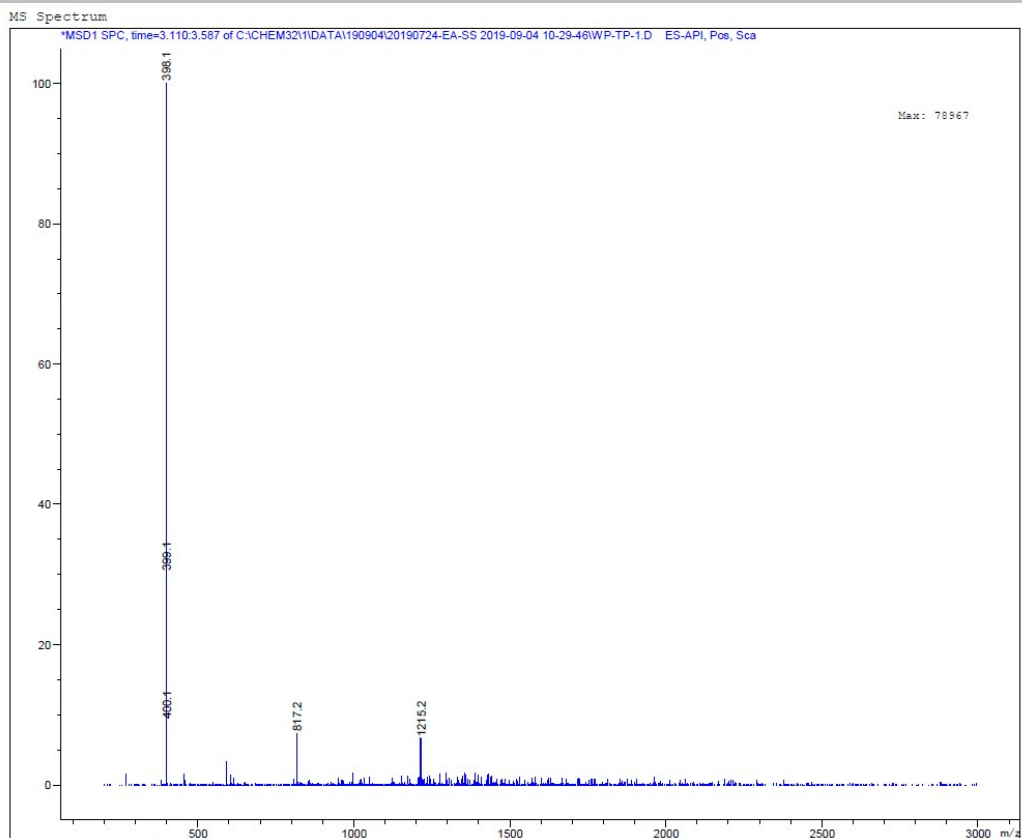

Figure S14. MS spectrum of ICTAD-1

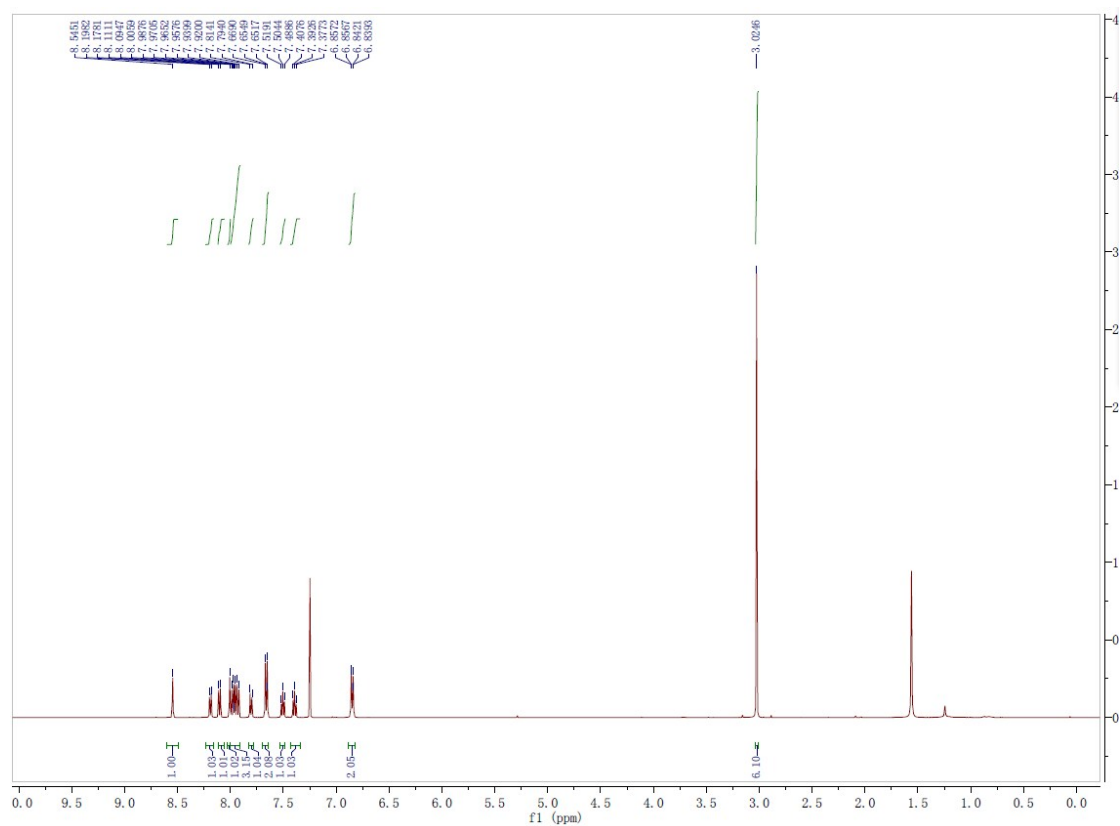

Figure S15. <sup>1</sup>H-NMR spectrum of ICTAD-2

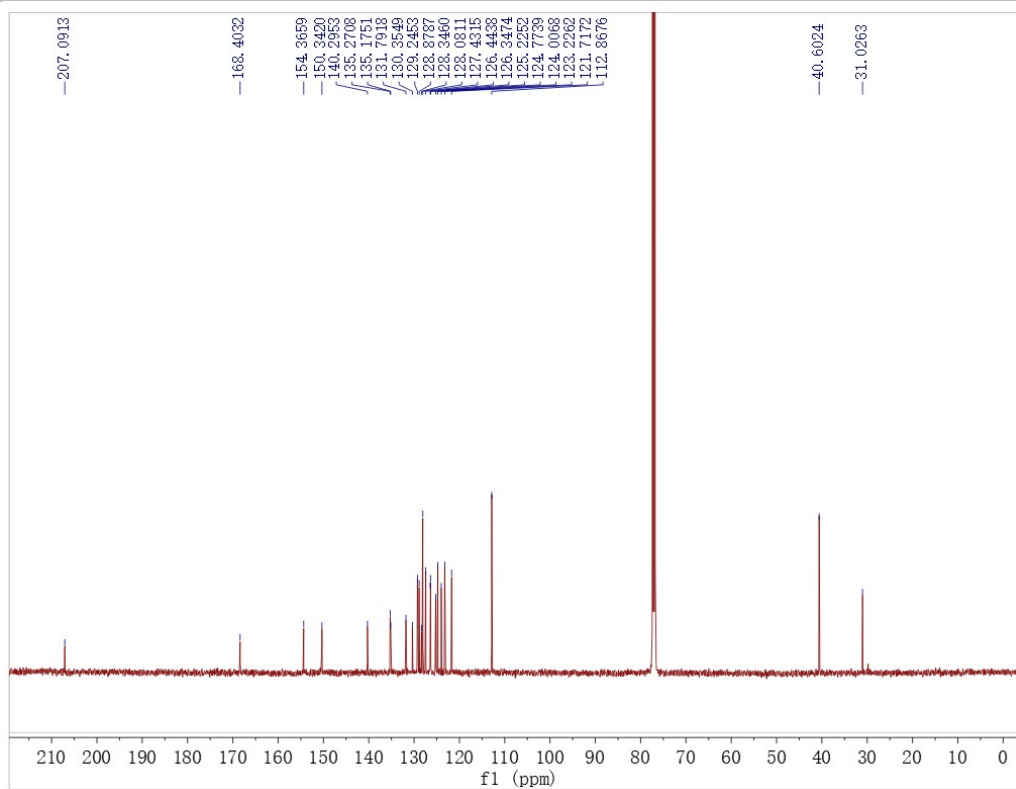

Figure S16. <sup>13</sup>C-NMR spectrum of ICTAD-2

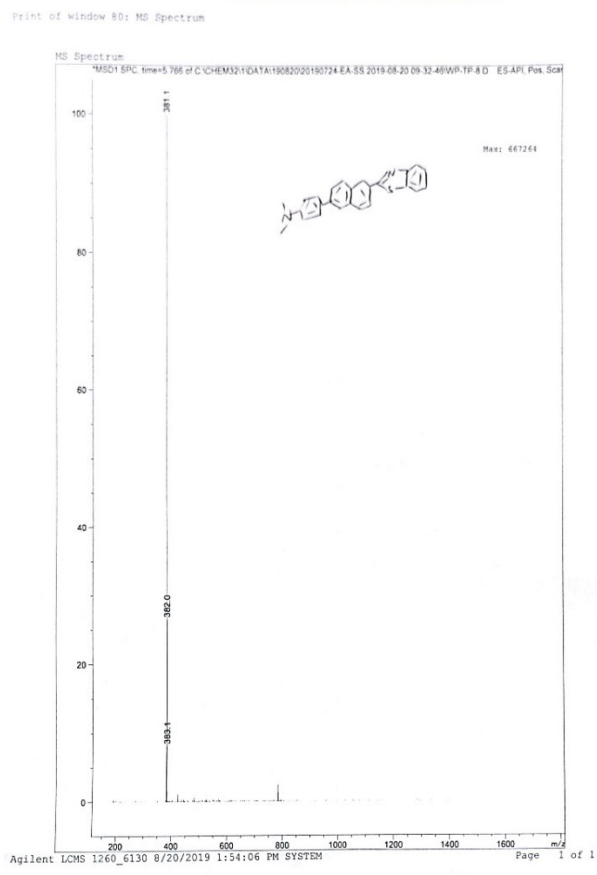

Figure S17. MS spectrum of ICTAD-2



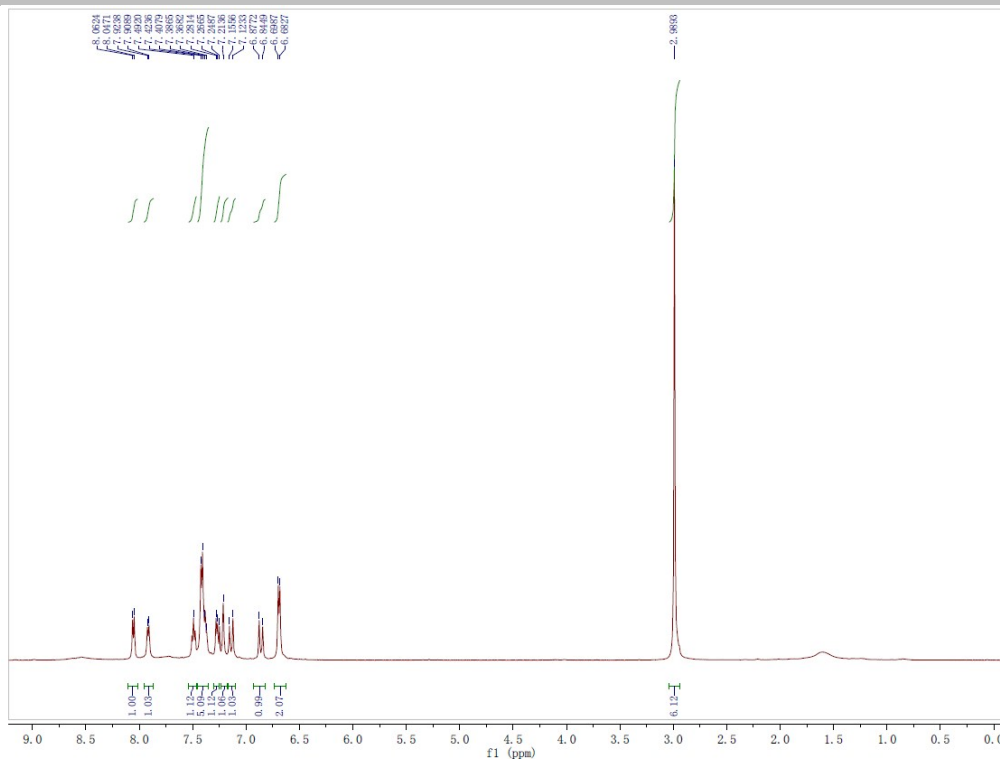

Figure S18. <sup>1</sup>H-NMR spectrum of ICTAD-3

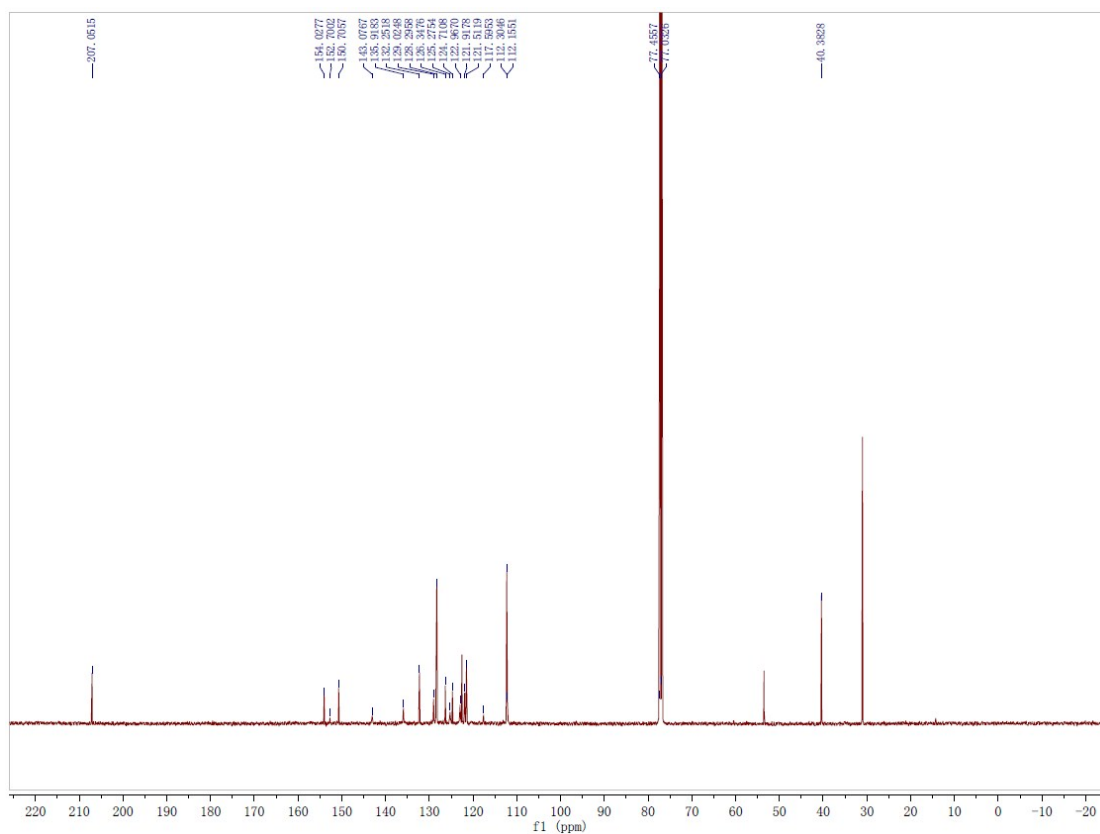

Figure S19. <sup>13</sup>C-NMR spectrum of ICTAD-3

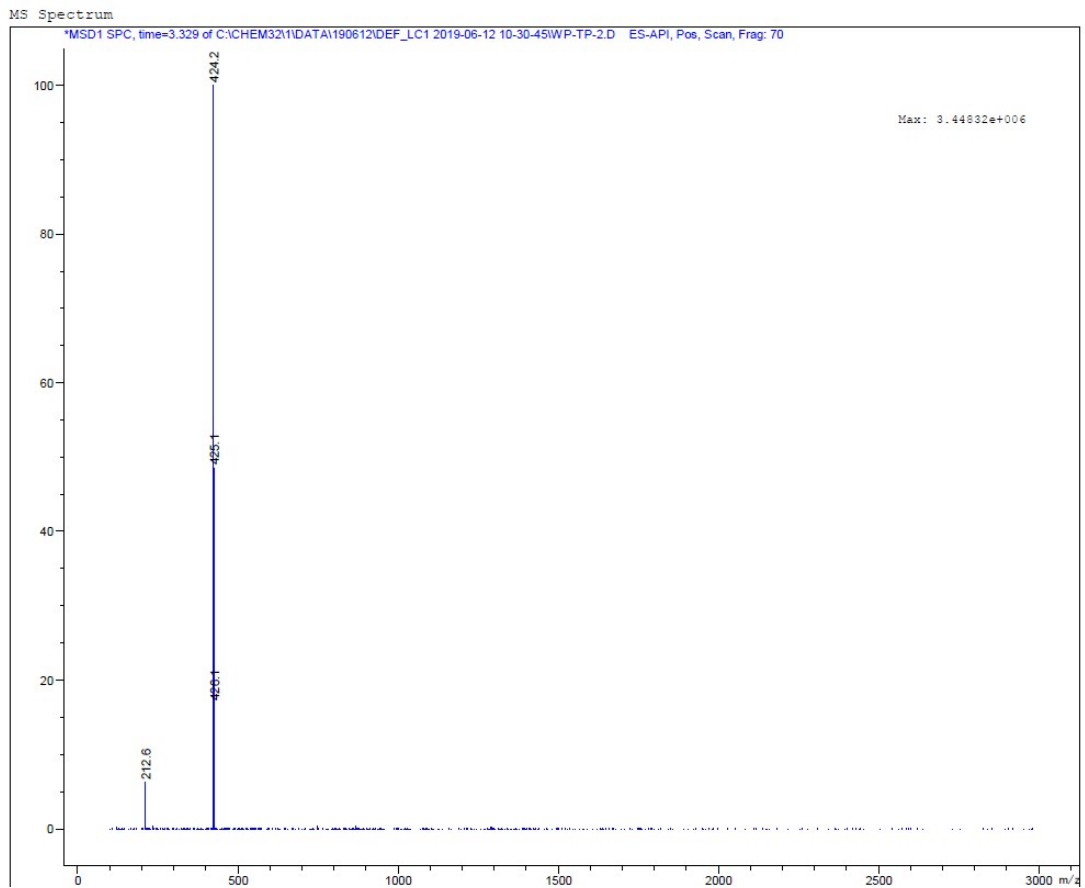

Figure S20. MS spectrum of ICTAD-3

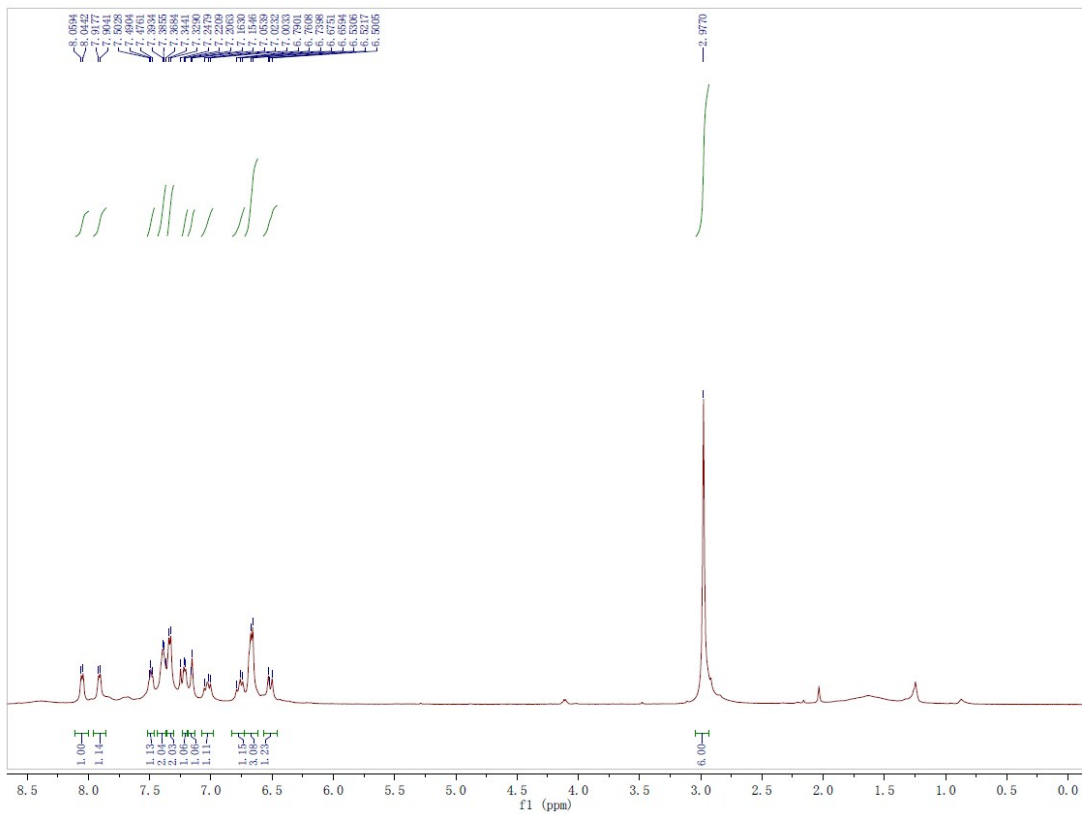

Figure S21. <sup>1</sup>H-NMR spectrum of ICTAD-4

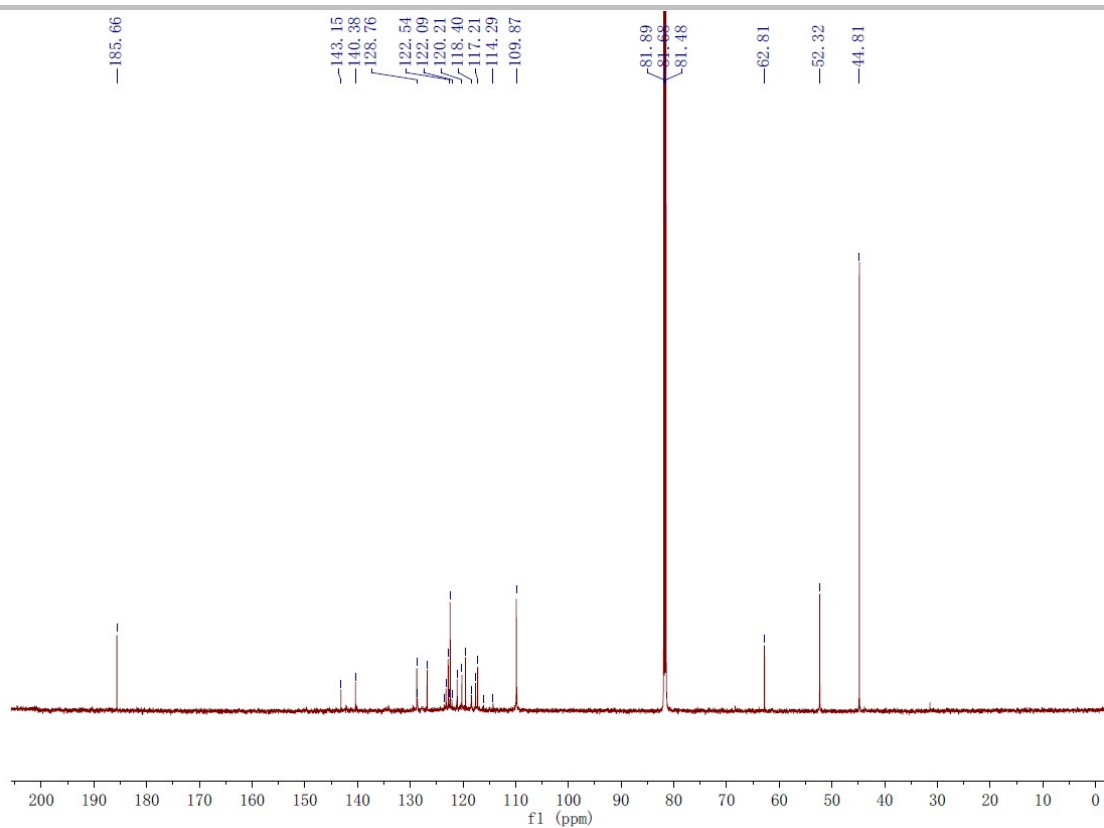

Figure S22. <sup>13</sup>C-NMR spectrum of ICTAD-4

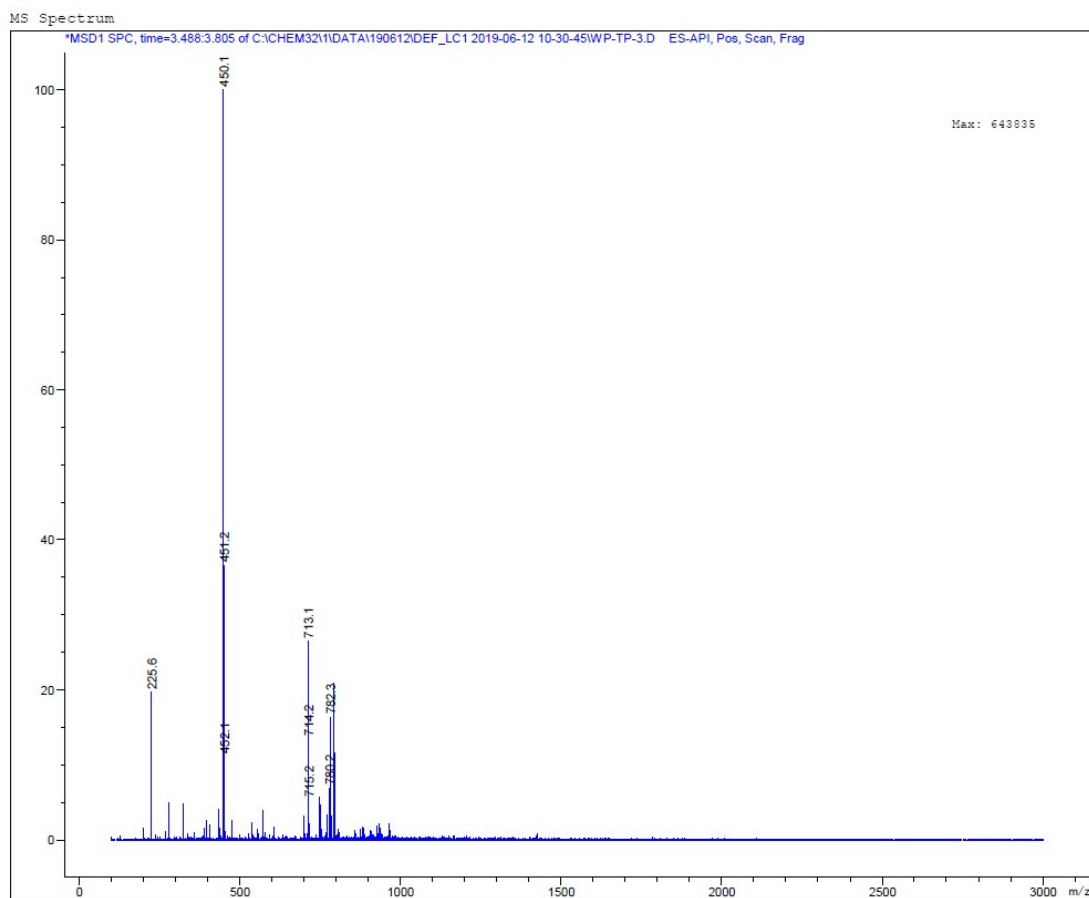

Figure S23. MS spectrum of ICTAD-4
